# Supplementary material for: Temporal Dominance of B.1.1.7 over B.1.354 SARS-CoV-2 Variant: A Hypothesis Based on Areas of Variant Co-Circulation
Source: MDPI journal article supplement (doi:10.3390/life11050375), 2021-04-22
Supplement: s1 [file s1]

**Table S1.** Information related to the number of variant sequences, the earliest variant sequence, the last detection date, and the corresponding proportions for B.1.1.7 and B.1.351 variants of concern (VOC).

| VOC            |                | B.1.1.7                                              |                           |                                                    |                                       |                    | B.1.351        |                           |                                                    |                                       |                    |
|----------------|----------------|------------------------------------------------------|---------------------------|----------------------------------------------------|---------------------------------------|--------------------|----------------|---------------------------|----------------------------------------------------|---------------------------------------|--------------------|
| Countries      | Proportion (%) | Proportion of SGTF <sup>1</sup> - week 8 of 2021 (%) | Earliest variant sequence | Number of variant sequences (updated) <sup>2</sup> | Proportion (updated) (%) <sup>2</sup> | Date last detected | Proportion (%) | Earliest variant sequence | Number of variant sequences (updated) <sup>2</sup> | Proportion (updated) (%) <sup>2</sup> | Date last detected |
| Ireland        | 74.50          | 88.6                                                 | 17/12/2020                | 6394                                               | 71.1                                  | 02/04/2021         | 0.62           | 22/12/2020                | 47                                                 | 0.5                                   | 02/04/2021         |
| United Kingdom | 51.99          | NA <sup>3</sup>                                      | 20/09/2020                | 200299                                             | 54.5                                  | 09/04/2021         | 0.16           | 10/12/2020                | 501                                                | 0.1                                   | 09/04/2021         |
| Ghana          | 54.03          | NA                                                   | 10/12/2020                | NA                                                 | NA                                    | NA                 | 4.21           | 06/01/2021                | NA                                                 | NA                                    | NA                 |
| Finland        | 47.43          | NA                                                   | 18/12/2020                | NA                                                 | NA                                    | NA                 | 1.07           | 19/12/2020                | NA                                                 | NA                                    | NA                 |
| Italy          | 43.67          | NA                                                   | 14/12/2020                | 9574                                               | 51.9                                  | 09/04/2021         | 0.21           | 30/01/2021                | 49                                                 | 0.3                                   | 09/04/2021         |
| France         | 42.75          | 65.8                                                 | 13/12/2020                | 7511                                               | 43.6                                  | 08/04/2021         | 3.48           | 22/12/2020                | 620                                                | 3.6                                   | 08/04/2021         |
| Slovenia       | 40.00          | NA                                                   | 29/12/2020                | 900                                                | 15.9                                  | 31/03/2021         | 3.64           | 09/02/2021                | 26                                                 | 0.5                                   | 31/03/2021         |
| Belgium        | 39.33          | 46.3                                                 | 30/11/2020                | 6352                                               | 43.9                                  | 07/04/2021         | 5.02           | 20/12/2020                | 691                                                | 4.8                                   | 07/04/2021         |
| Spain          | 33.53          | 25-30                                                | 08/11/2020                | 5185                                               | 28.3                                  | 07/04/2021         | 0.34           | 24/12/2020                | 38                                                 | 0.2                                   | 07/04/2021         |
| Sweden         | 32.39          | 41.5 <sup>4</sup>                                    | 20/12/2020                | 4471                                               | 35.5                                  | 05/04/2021         | 1.22           | 24/12/2020                | 300                                                | 2.4                                   | 05/04/2021         |
| New Zealand    | 48.09          | NA                                                   | 16/12/2020                | 98                                                 | 9.8                                   | 30/03/2021         | 16.96          | 29/12/2020                | 23                                                 | 2.3                                   | 30/03/2021         |
| Portugal       | 30.17          | 50.5                                                 | 09/11/2020                | NA                                                 | NA                                    | NA                 | 0.51           | 04/01/2021                | NA                                                 | NA                                    | NA                 |
| Germany        | 30.44          | 54.5                                                 | 30/11/2020                | 28893                                              | 52.0                                  | 07/04/2021         | 1.03           | 21/12/2020                | 897                                                | 1.6                                   | 07/04/2021         |
| Israel         | 28.74          | ~90 <sup>5</sup>                                     | 16/12/2020                | NA                                                 | NA                                    | NA                 | 1.92           | 31/12/2020                | NA                                                 | NA                                    | NA                 |
| Turkey         | 29.15          | NA                                                   | 24/12/2020                | 528                                                | 15.3                                  | 29/03/2021         | 3.78           | 22/01/2021                | 124                                                | 3.6                                   | 29/03/2021         |
| Norway         | 28.49          | 72.5                                                 | 09/12/2020                | NA                                                 | NA                                    | NA                 | 3.92           | 27/12/2020                | NA                                                 | NA                                    | NA                 |
| Netherlands    | 22.00          | 64.3 <sup>5</sup>                                    | 12/11/2020                | 8403                                               | 40.5                                  | 04/04/2021         | 1.63           | 22/12/2020                | 383                                                | 1.8                                   | 04/04/2021         |
| Croatia        | 22.06          | NA                                                   | 20/01/2021                | NA                                                 | NA                                    | NA                 | 2.13           | 09/02/2021                | NA                                                 | NA                                    | NA                 |
| Australia      | 22.52          | NA                                                   | 30/11/2020                | 252                                                | 1.5                                   | 11/04/2021         | 4.14           | 10/12/2020                | 41                                                 | 0.2                                   | 11/04/2021         |
| Poland         | 20.08          | 9                                                    | 22/12/2020                | 3402                                               | 65.2                                  | 04/04/2021         | 2.11           | 10/02/2021                | 14                                                 | 0.3                                   | 04/04/2021         |
| Austria        | 31.49          | 63.2                                                 | 22/12/2020                | 1044                                               | 28.5                                  | 29/03/2021         | 15.09          | 23/12/2020                | 235                                                | 6.4                                   | 29/03/2021         |
| South Korea    | 16.45          | NA                                                   | 14/12/2020                | 104                                                | 3.2                                   | 05/04/2021         | 0.97           | 26/12/2020                | 5                                                  | 0.2                                   | 05/04/2021         |
| Switzerland    | 15.80          | 40.5 <sup>5</sup>                                    | 09/11/2020                | 5859                                               | 22.7                                  | 06/04/2021         | 0.63           | 12/11/2020                | 137                                                | 0.5                                   | 06/04/2021         |

|                          |       |      |            |       |      |            |       |            |     |     |            |
|--------------------------|-------|------|------------|-------|------|------------|-------|------------|-----|-----|------------|
| Denmark                  | 12.47 | 76.5 | 09/11/2020 | NA    | NA   | NA         | 0.06  | 04/01/2021 | NA  | NA  | NA         |
| Singapore                | 19.70 | NA   | 08/12/2020 | 126   | 6.1  | 07/04/2021 | 8.45  | 07/02/2021 | 118 | 5.7 | 07/04/2021 |
| United Arab Emirates     | 14.19 | NA   | 16/11/2020 | NA    | NA   | NA         | 7.81  | 26/12/2020 | NA  | NA  | NA         |
| Canada                   | 4.83  | NA   | 15/12/2020 | 3115  | 11.3 | 30/03/2021 | 0.26  | 25/12/2020 | 88  | 0.3 | 30/03/2021 |
| Luxembourg               | 8.40  | 65.5 | 24/12/2020 | 1467  | 24.7 | 30/03/2021 | 4.17  | 16/01/2021 | 415 | 7.0 | 30/03/2021 |
| United States of America | 3.58  | 26.2 | 17/12/2020 | 31421 | 11.4 | 09/04/2021 | 0.06  | 01/01/2021 | 513 | 0.2 | 09/04/2021 |
| Thailand                 | 6.06  | NA   | 08/01/2021 | 44    | 4.9  | 06/04/2021 | 3.61  | 03/02/2021 | 7   | 0.8 | 06/04/2021 |
| Japan                    | 1.07  | NA   | 01/12/2020 | 455   | 1.5  | 07/04/2021 | 0.26  | 19/12/2020 | 22  | 0.1 | 07/04/2021 |
| Mayotte                  | 0.19  | NA   | 13/01/2021 | NA    | NA   | NA         | 52.24 | 07/01/2021 | NA  | NA  | NA         |
| South Africa             | 0.47  | NA   | 09/01/2021 | NA    | NA   | NA         | 65.74 | 08/10/2020 | NA  | NA  | NA         |

<sup>1</sup> SGTf: S gene target failure, <sup>2</sup> The number of variant sequences and proportions were updated to the corresponding last detection date that is later than 29 March 2021, <sup>3</sup> NA: Not available, <sup>4</sup> Based on sequencing of all variants with N501Y+A570D, <sup>5</sup> Data available for week 7
